# Supplementary material for: Anti-Inflammatory Lobane and Prenyleudesmane Diterpenoids from the Soft Coral Lobophytum varium
Source: Mar Drugs. 2017 Sep 29;15(10):300. doi: 10.3390/md15100300 (PMC5666408; doi:10.3390/md15100300)
Supplement: Supplementary file 1 [file marinedrugs-15-00300-s001.pdf]

# Supplementary Materials: Anti-inflammatoory Lobane and Prenyleudesmane Diterpenoids from the Soft Coral *Lobophytum varium*

Atallah F. Ahmed, Wan-Ting Teng, Chiung-Yao Huang, Chang-Feng Dai, Tsong-Long Hwang and Jyh-Horng Sheu

## List of Supplementary material

| No.               | Content                                                                              | Page |
|-------------------|--------------------------------------------------------------------------------------|------|
| <b>Figure S1</b>  | HRESIMS spectrum of <b>1</b>                                                         | S2   |
| <b>Figure S2</b>  | <sup>1</sup> H NMR spectrum of <b>1</b> in C <sub>6</sub> D <sub>6</sub> at 400 MHz  | S3   |
| <b>Figure S3</b>  | <sup>13</sup> C NMR spectrum of <b>1</b> in C <sub>6</sub> D <sub>6</sub> at 100 MHz | S4   |
| <b>Figure S4</b>  | HRESIMS spectrum of <b>2</b>                                                         | S5   |
| <b>Figure S5</b>  | <sup>1</sup> H NMR spectrum of <b>2</b> in CDCl <sub>3</sub> at 500 MHz              | S6   |
| <b>Figure S6</b>  | <sup>13</sup> C NMR spectrum of <b>2</b> in CDCl <sub>3</sub> at 125 MHz             | S7   |
| <b>Figure S7</b>  | HRESIMS spectrum of <b>3</b>                                                         | S8   |
| <b>Figure S8</b>  | <sup>1</sup> H NMR spectrum of <b>3</b> in CDCl <sub>3</sub> at 400 MHz              | S9   |
| <b>Figure S9</b>  | <sup>13</sup> C NMR spectrum of <b>3</b> in CDCl <sub>3</sub> at 100 MHz             | S10  |
| <b>Figure S10</b> | HRESIMS spectrum of <b>4</b>                                                         | S11  |
| <b>Figure S11</b> | <sup>1</sup> H NMR spectrum of <b>4</b> in CDCl <sub>3</sub> at 400 MHz              | S12  |
| <b>Figure S12</b> | <sup>13</sup> C NMR spectrum of <b>4</b> in CDCl <sub>3</sub> at 400 MHz             | S13  |
| <b>Figure S13</b> | HRESIMS spectrum of <b>5</b>                                                         | S14  |
| <b>Figure S14</b> | <sup>1</sup> H NMR spectrum of <b>5</b> in CDCl <sub>3</sub> at 500 MHz              | S15  |
| <b>Figure S15</b> | <sup>13</sup> C NMR spectrum of <b>5</b> in CDCl <sub>3</sub> at 125 MHz             | S16  |

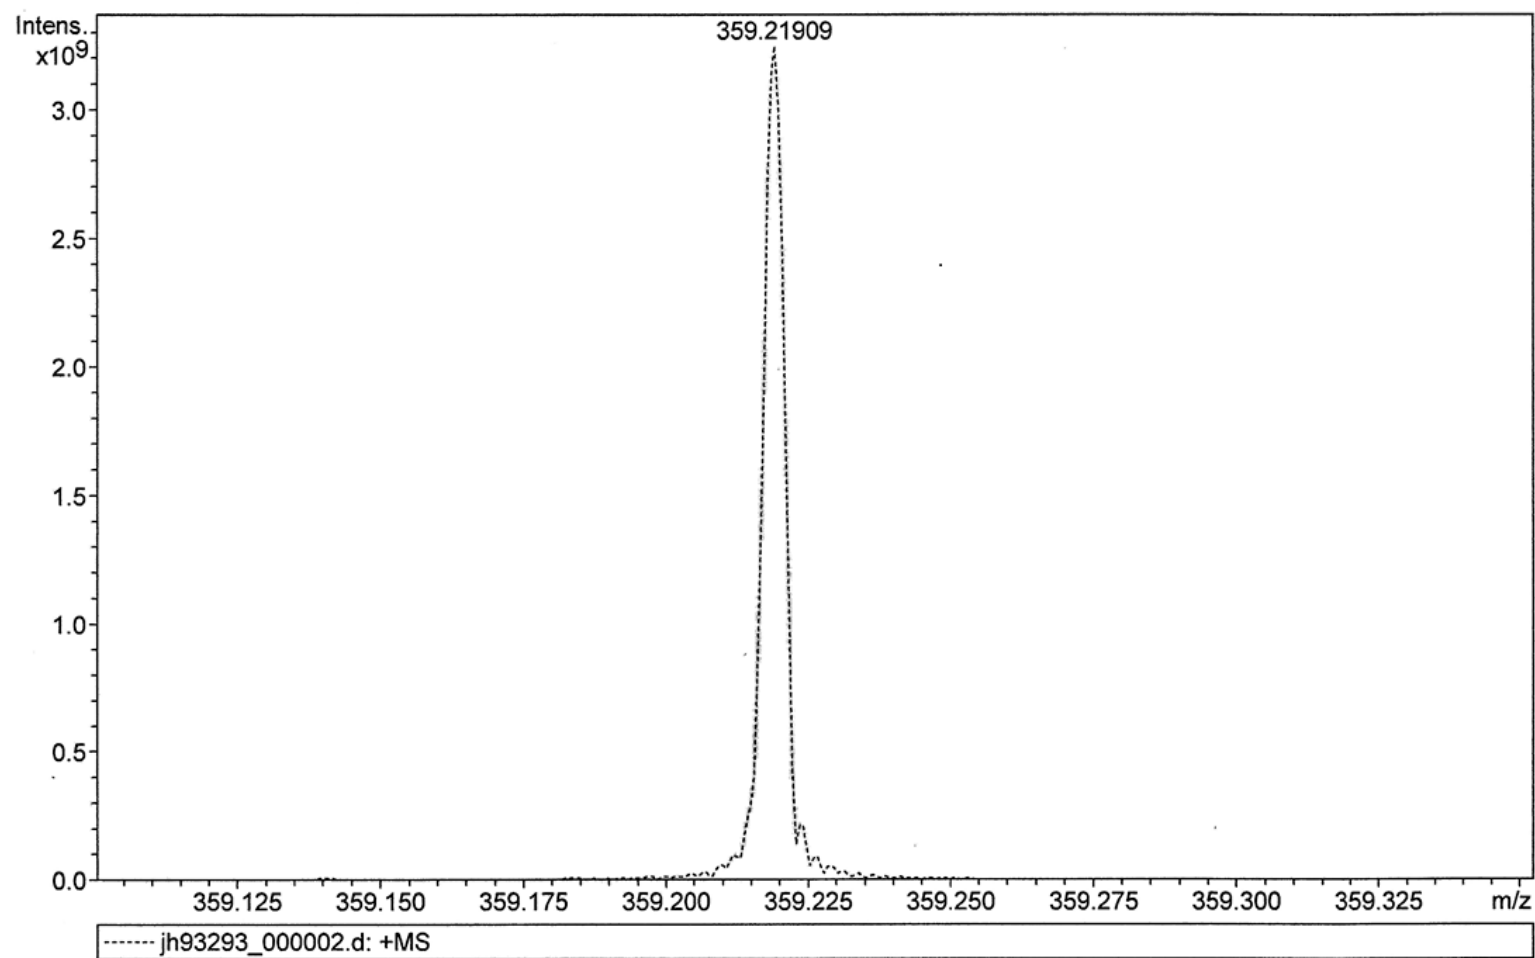

| Meas. m/z | # | Formula                                          | Score  | m/z       | err [mDa] | err [ppm] | mSigma | rdb | e <sup>-</sup> Conf | N-Rule |
|-----------|---|--------------------------------------------------|--------|-----------|-----------|-----------|--------|-----|---------------------|--------|
| 359.21909 | 1 | C <sub>20</sub> H <sub>32</sub> NaO <sub>4</sub> | 100.00 | 359.21928 | 0.19      | 0.54      | 9.8    | 4.5 | even                | ok     |

Figure S1. HRESIMS spectrum of **1**

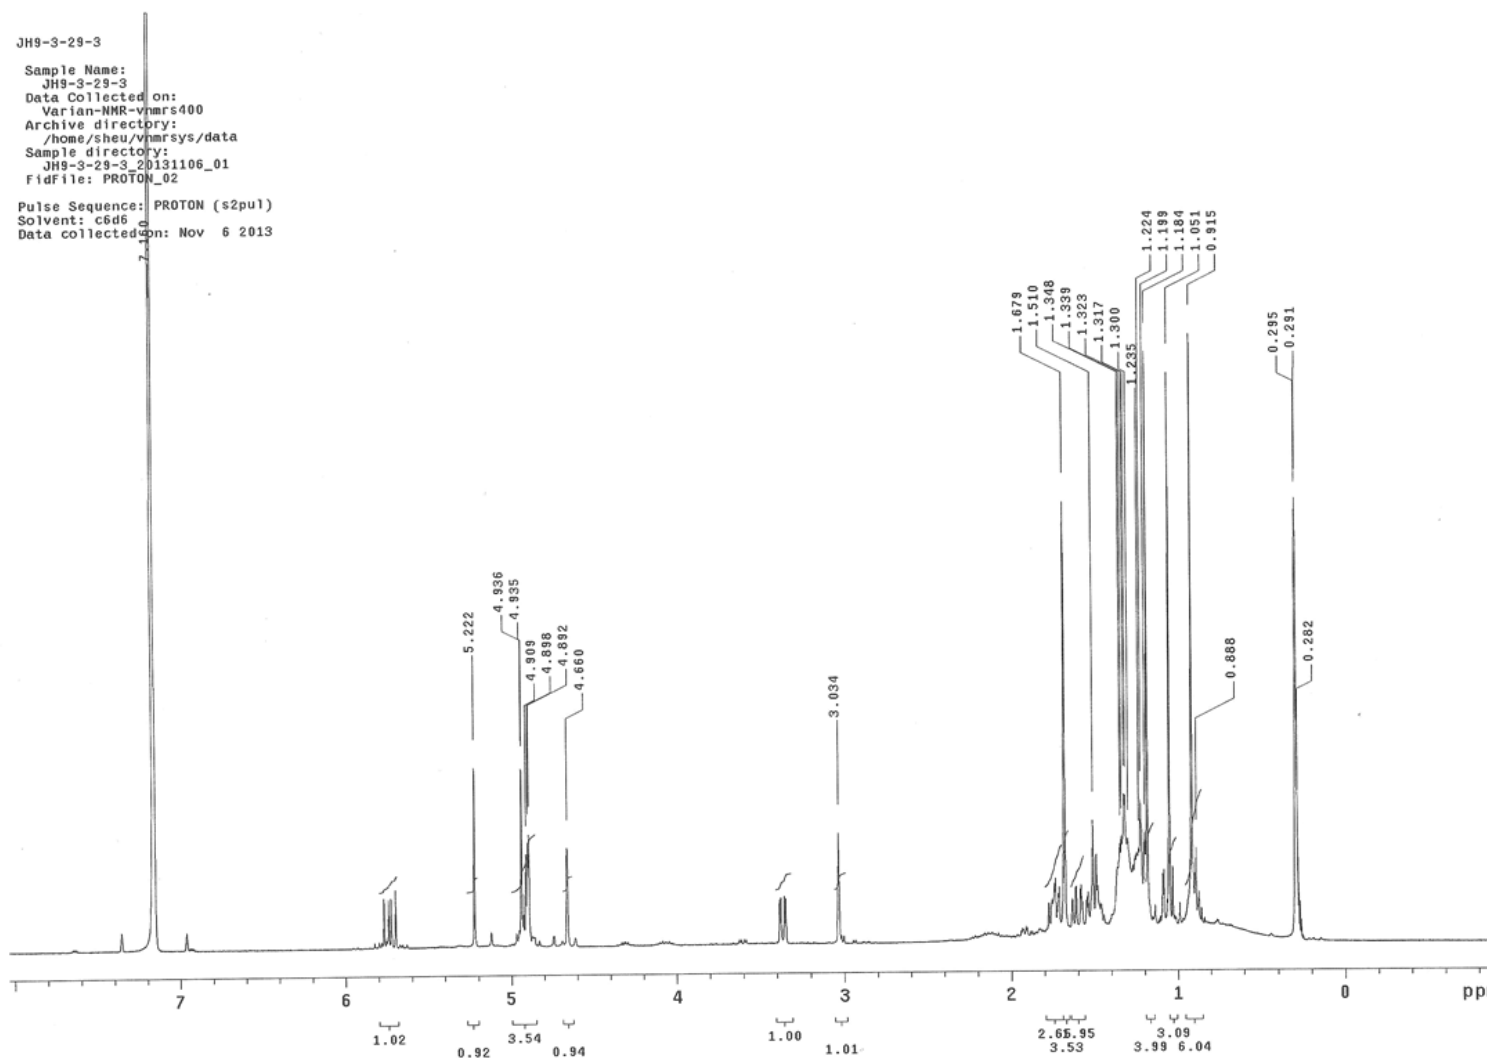

Figure S2.  $^1\text{H}$  NMR spectrum of **1** in  $\text{C}_6\text{D}_6$  at 400 MHz

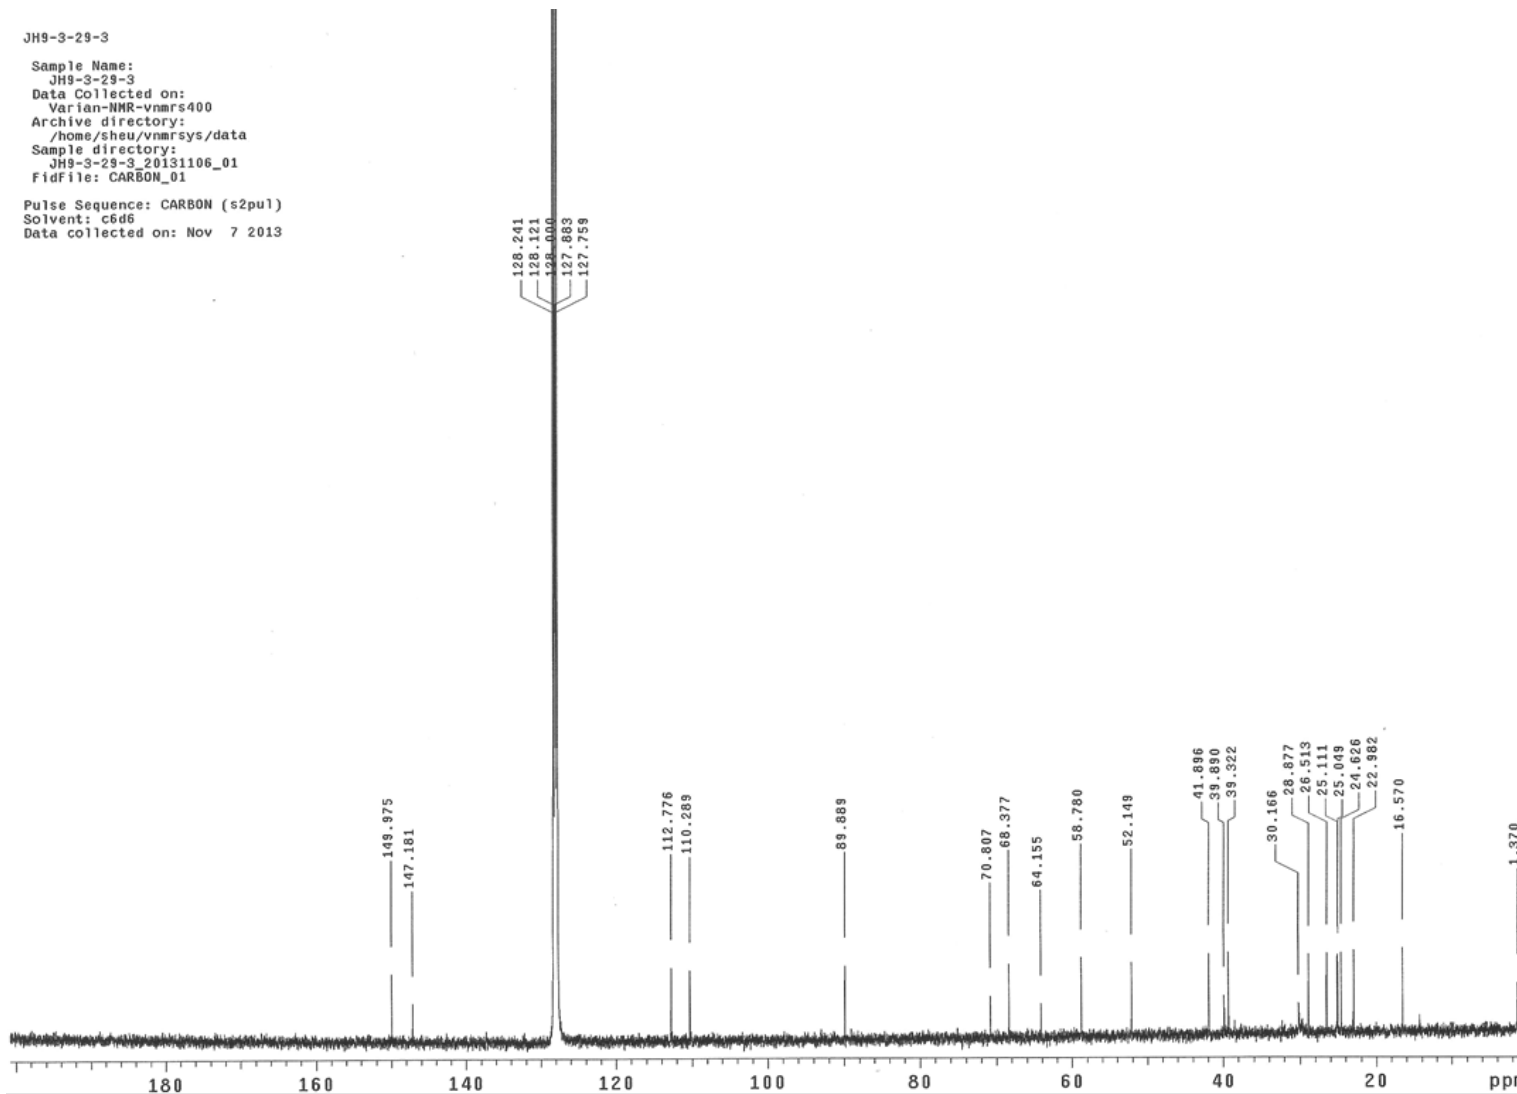

Figure S3.  $^{13}\text{C}$  NMR spectrum of **1** in  $\text{C}_6\text{D}_6$  at 100 MHz

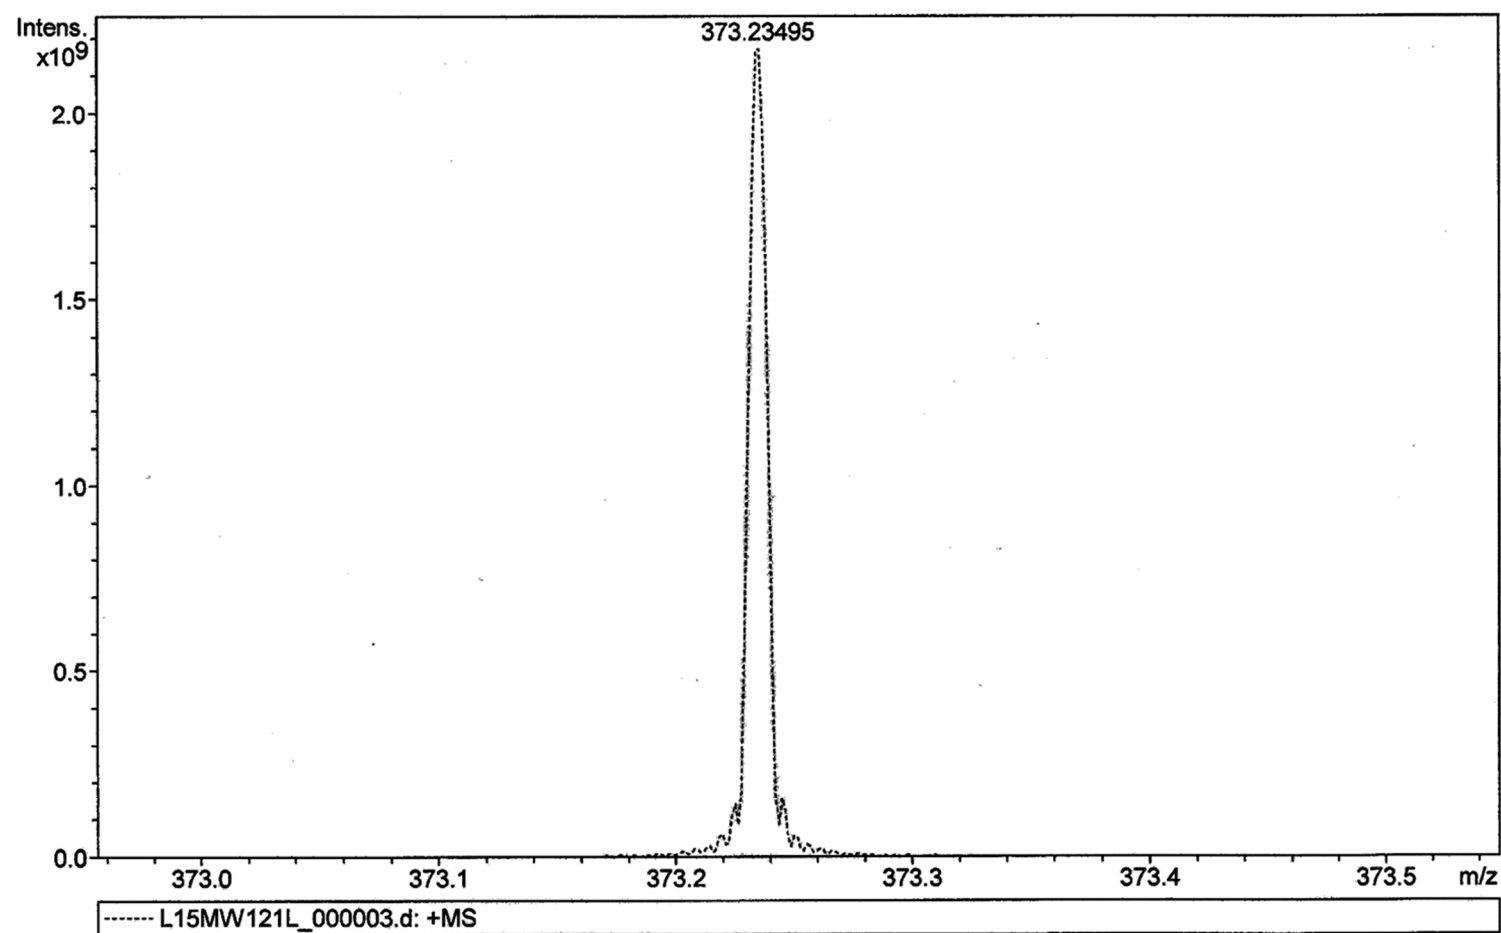

| Meas. m/z | # | Formula          | Score  | m/z       | err [mDa] | err [ppm] | mSigma | rdb | e <sup>-</sup> Conf | N-Rule |
|-----------|---|------------------|--------|-----------|-----------|-----------|--------|-----|---------------------|--------|
| 373.23495 | 1 | C 21 H 34 Na O 4 | 100.00 | 373.23493 | -0.02     | -0.06     | 4.8    | 4.5 | even                | ok     |

Figure S4. HRESIMS spectrum of 2

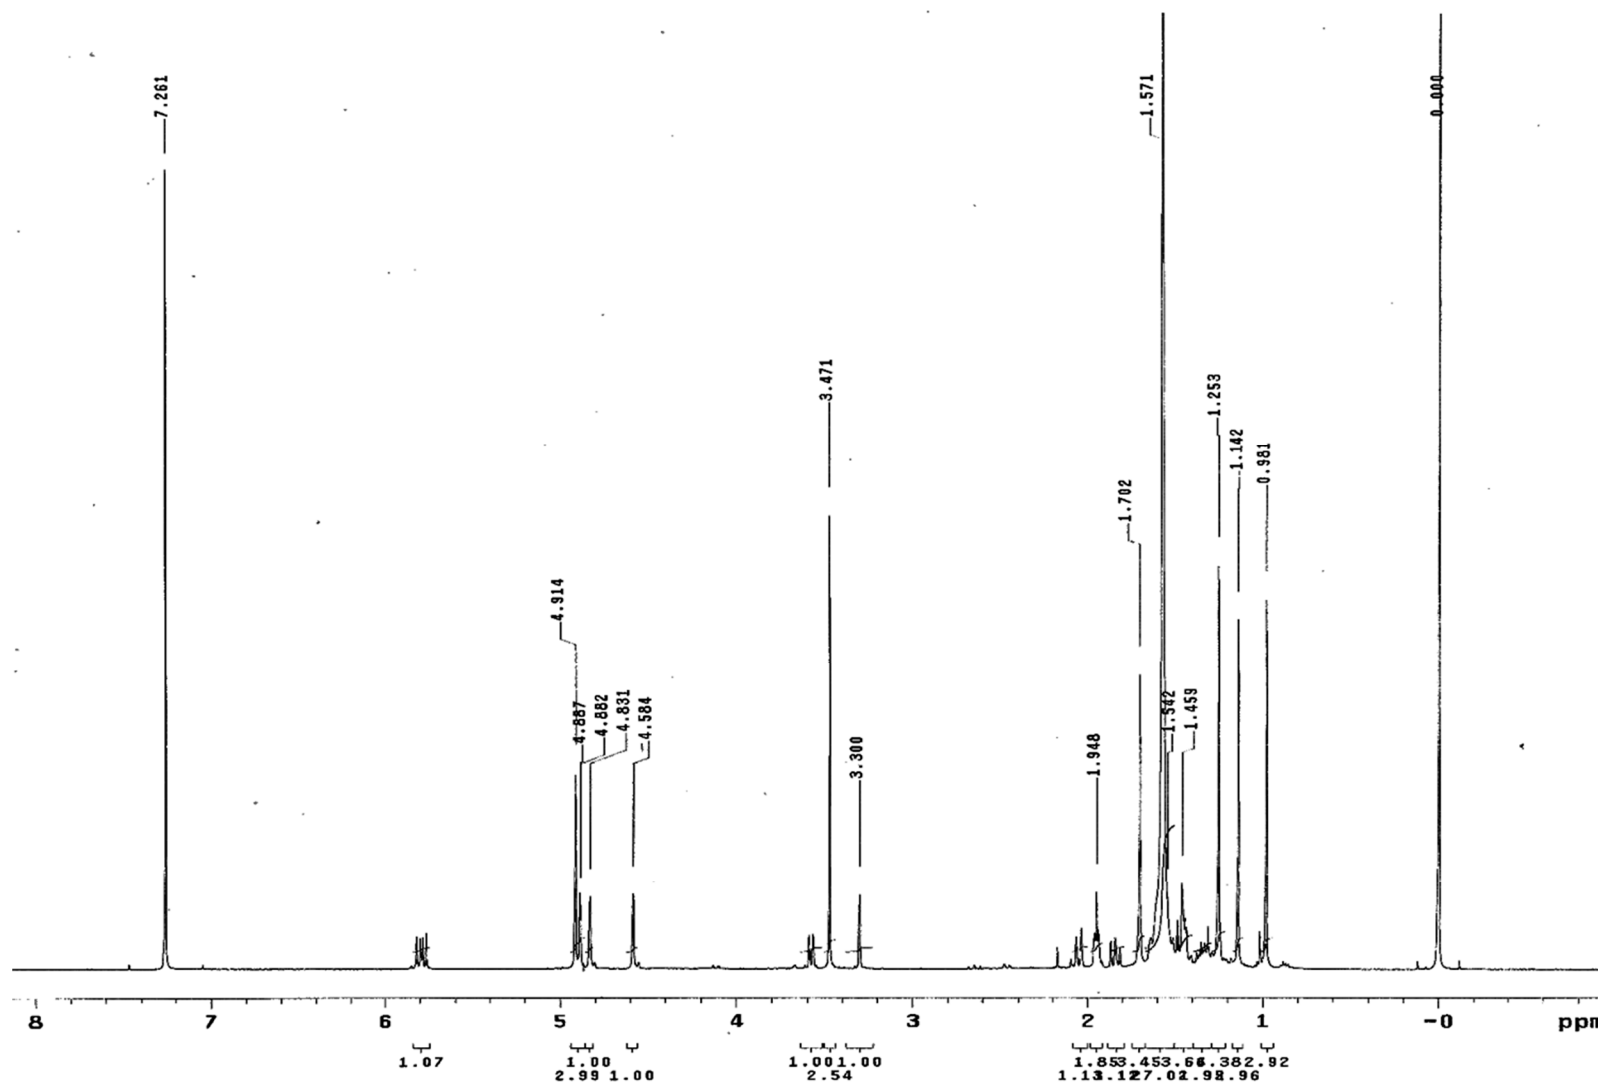Figure S5. <sup>1</sup>H NMR spectrum of 2 in CDCl<sub>3</sub> at 500 MHz

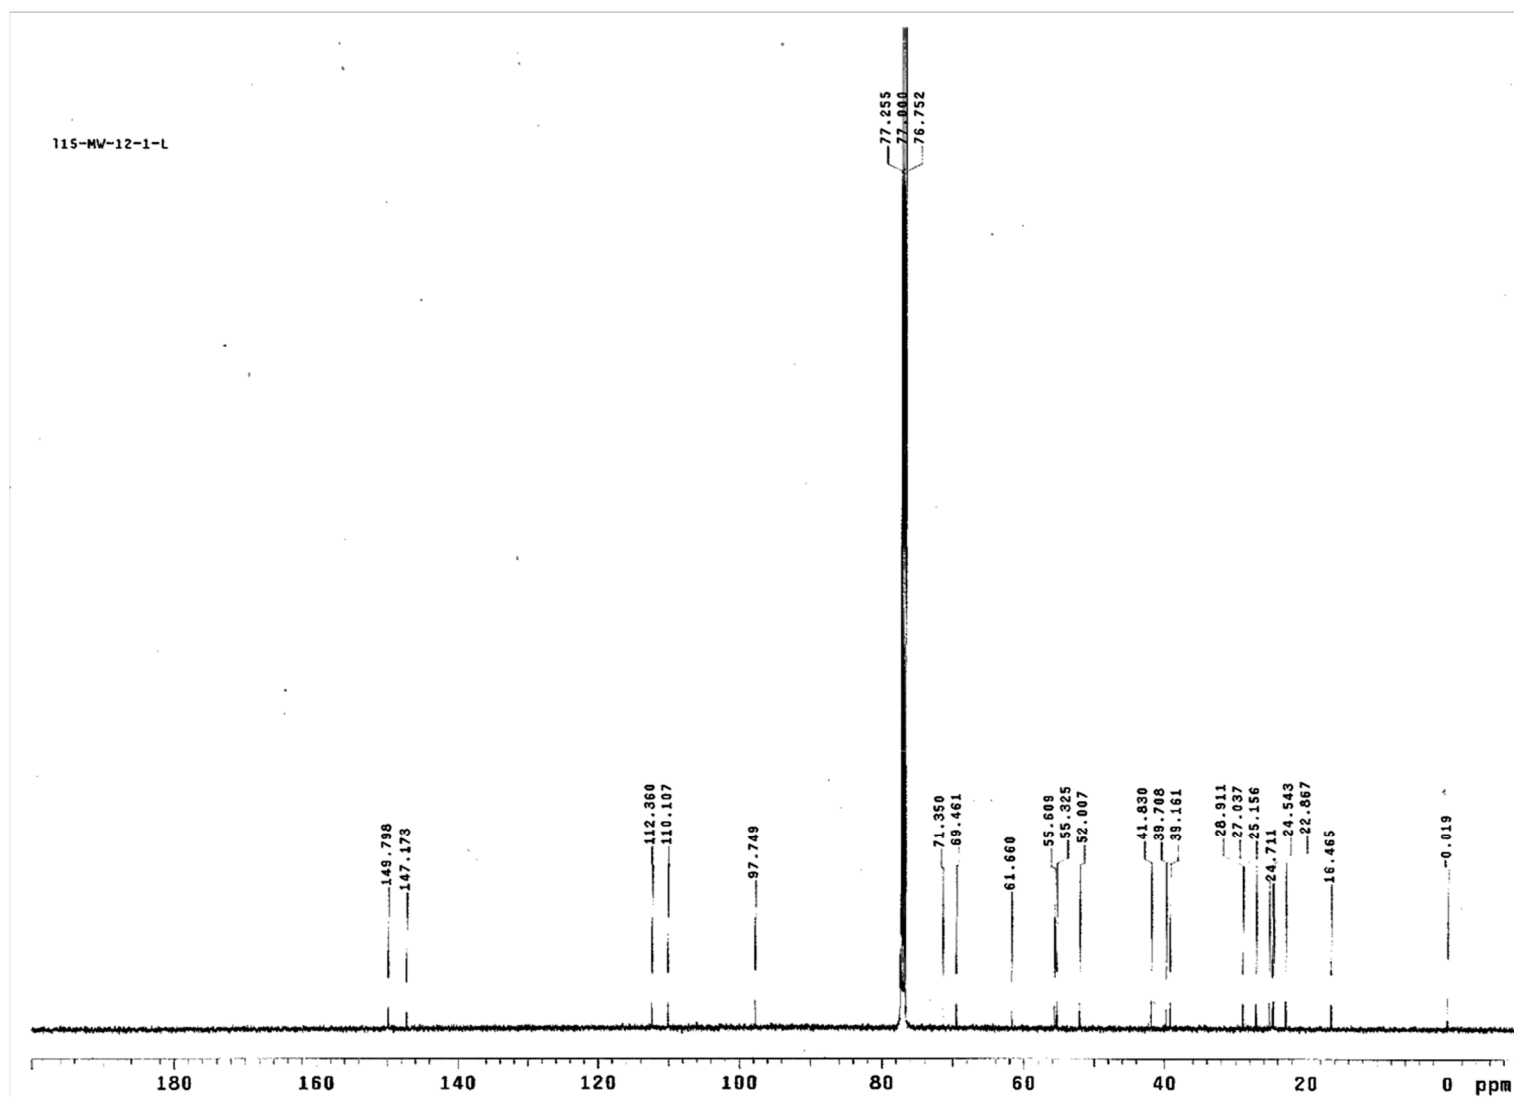

Figure S6.  $^{13}\text{C}$  NMR spectrum of **2** in  $\text{CDCl}_3$  at 125 MHz

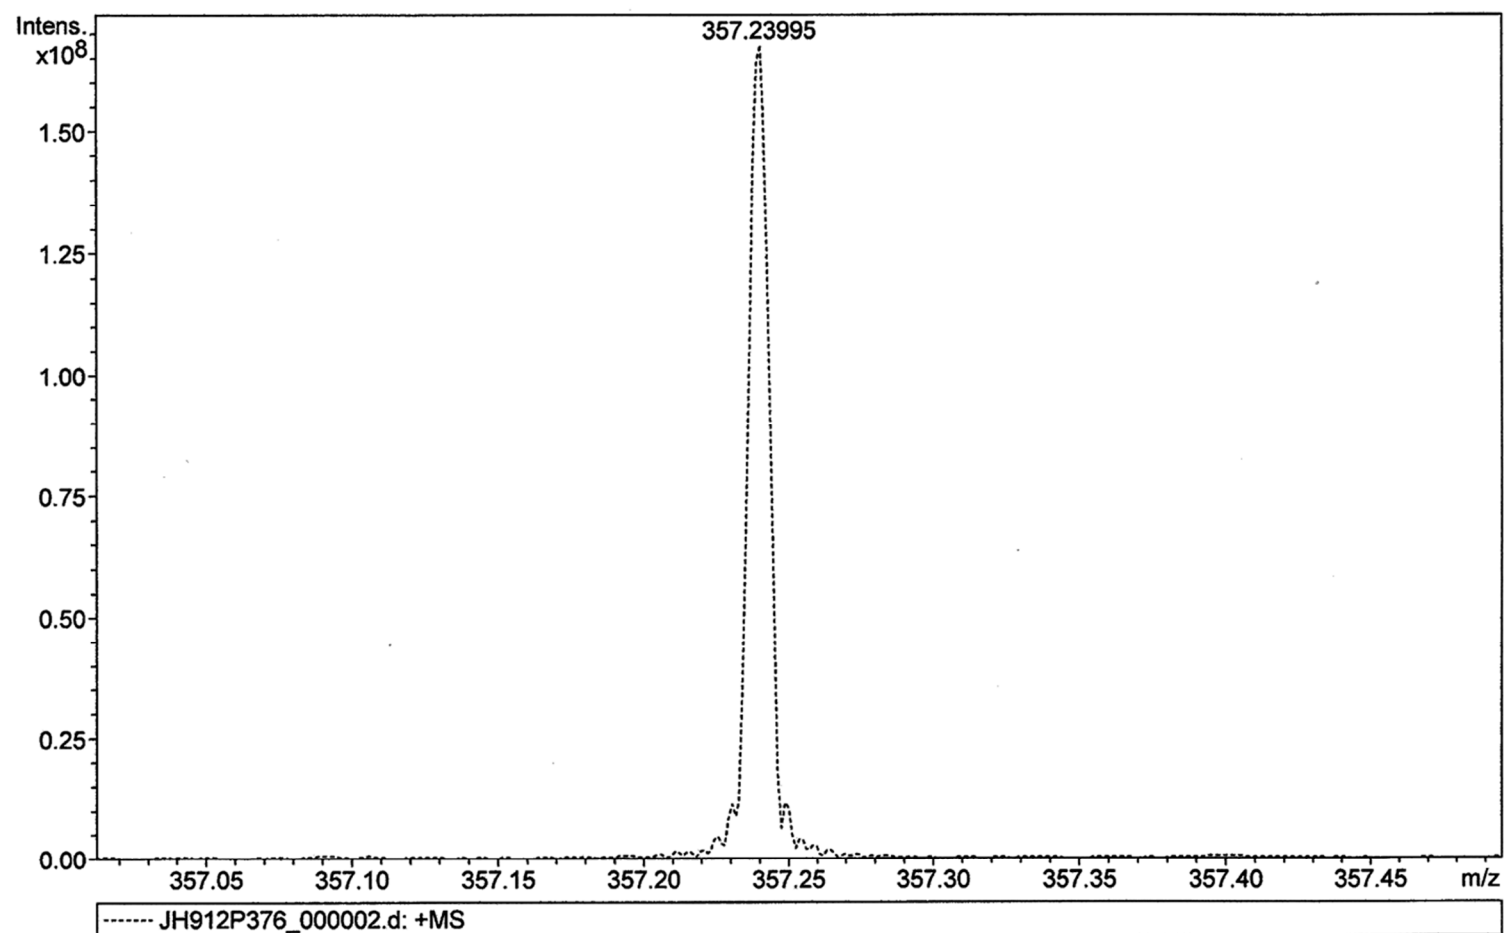

| Meas. m/z | # | Formula                                          | Score  | m/z       | err [mDa] | err [ppm] | mSigma | rdb | e <sup>-</sup> Conf | N-Rule |
|-----------|---|--------------------------------------------------|--------|-----------|-----------|-----------|--------|-----|---------------------|--------|
| 357.23995 | 1 | C <sub>21</sub> H <sub>34</sub> NaO <sub>3</sub> | 100.00 | 357.24002 | 0.06      | 0.18      | 6.5    | 4.5 | even                | ok     |

Figure S7. HRESIMS spectrum of 3

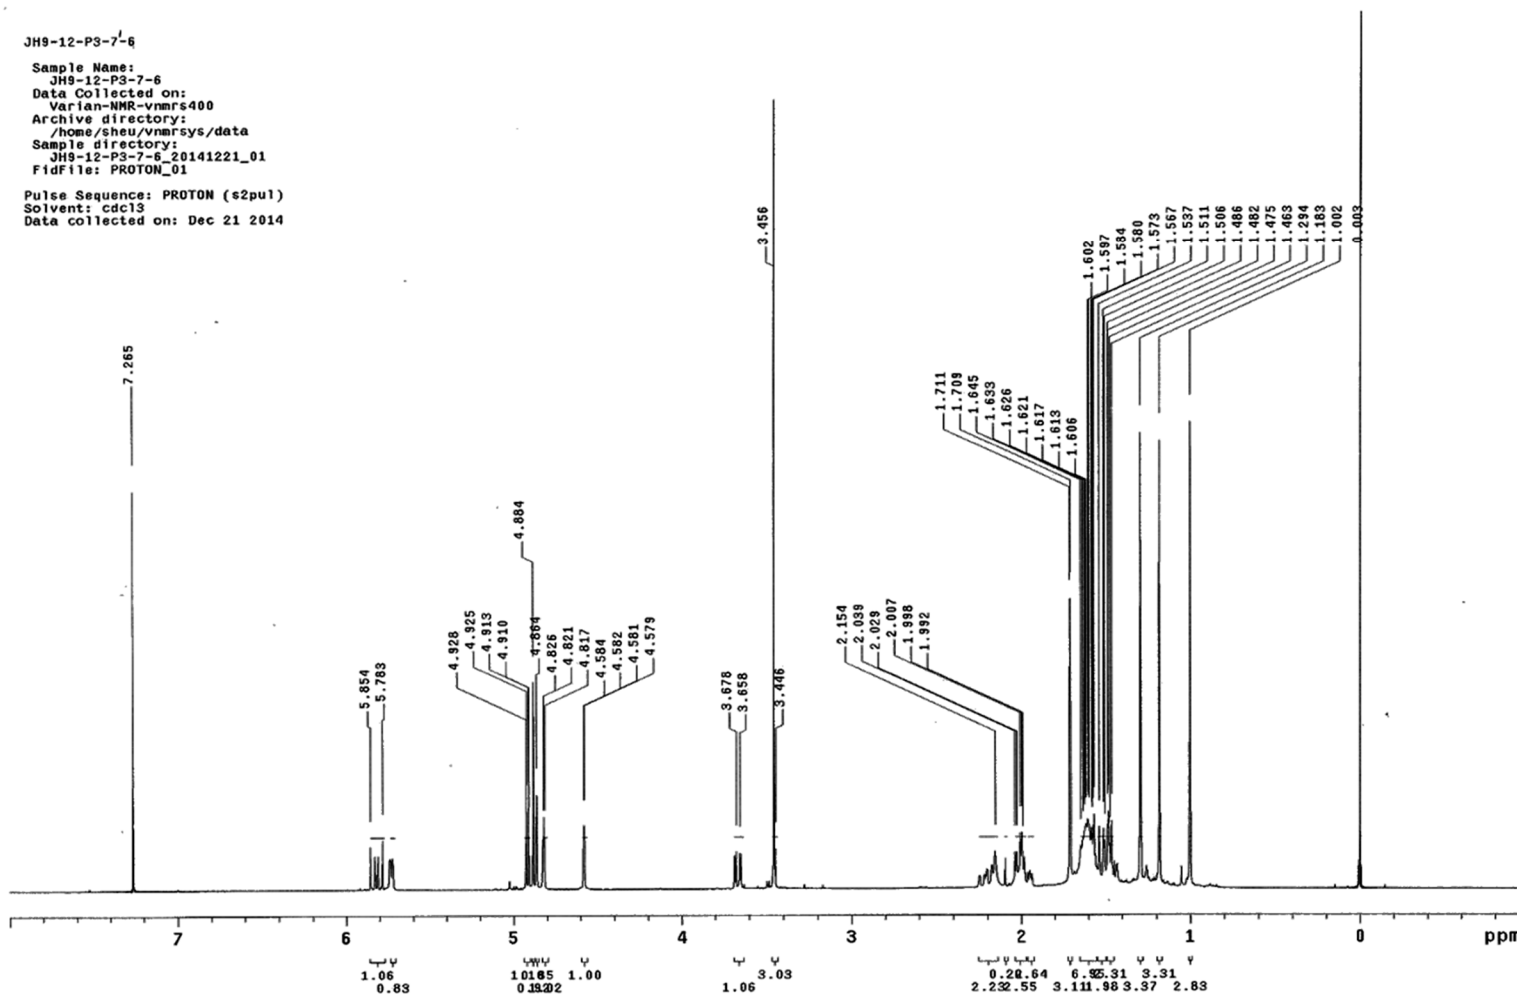Figure S8.  $^1\text{H}$  NMR spectrum of **3** in  $\text{CDCl}_3$  at 400 MHz

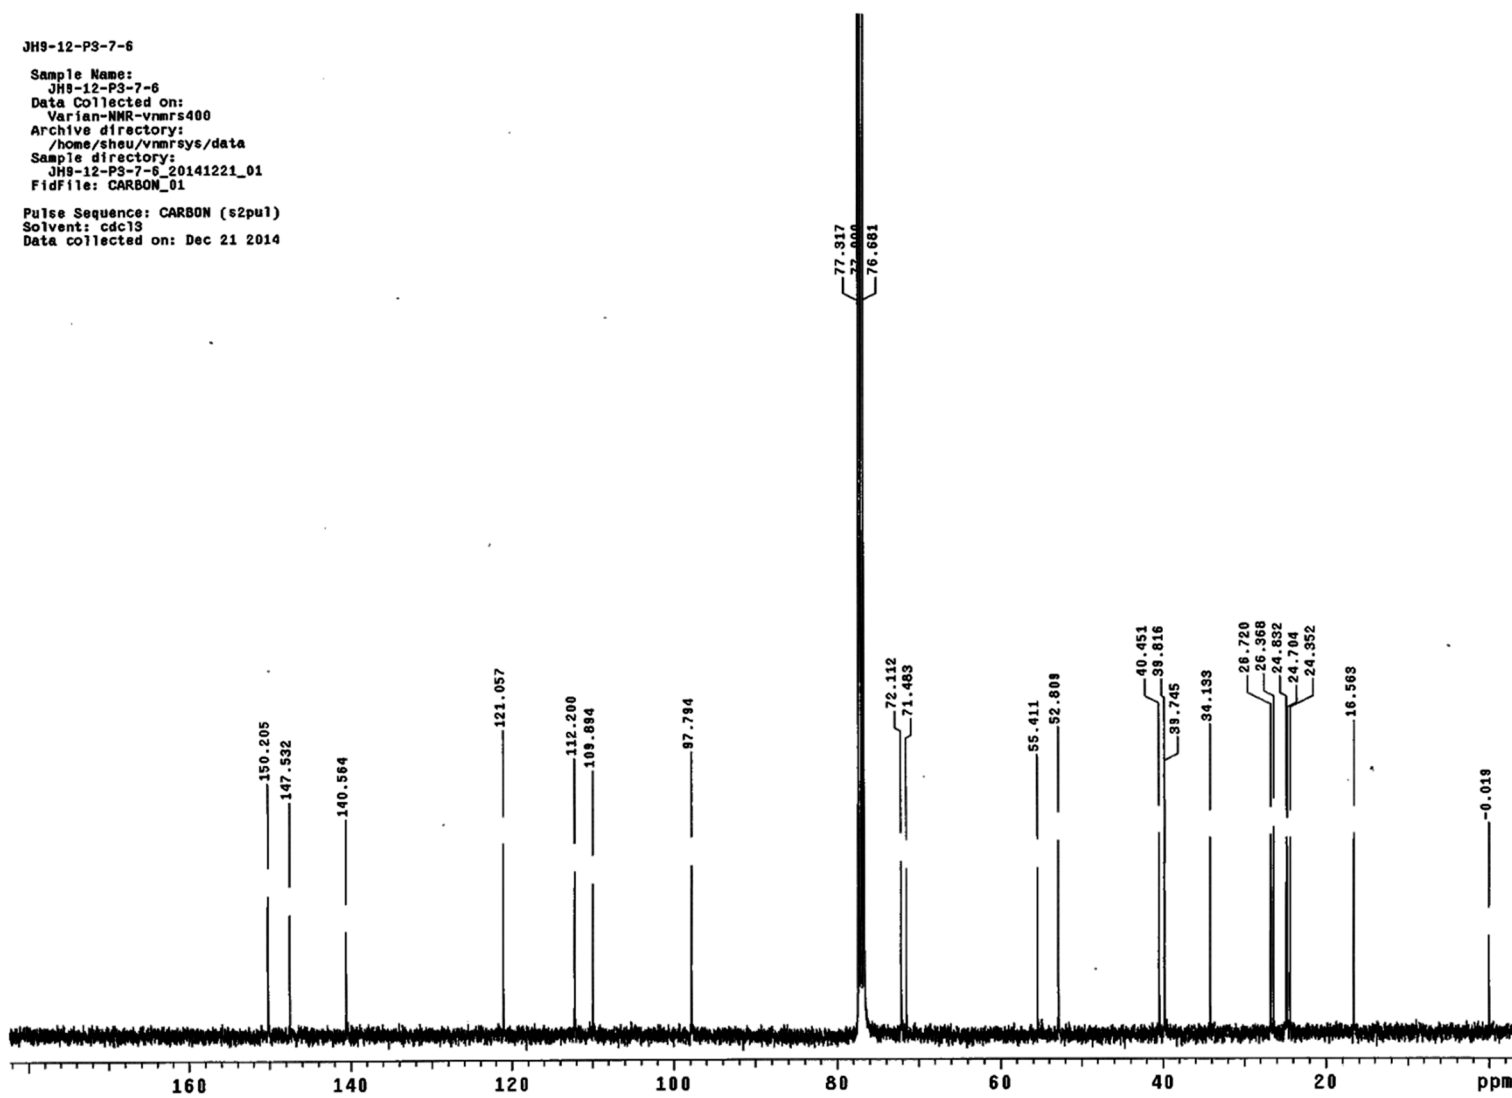Figure S9.  $^{13}\text{C}$  NMR spectrum of **3** in  $\text{CDCl}_3$  at 100 MHz

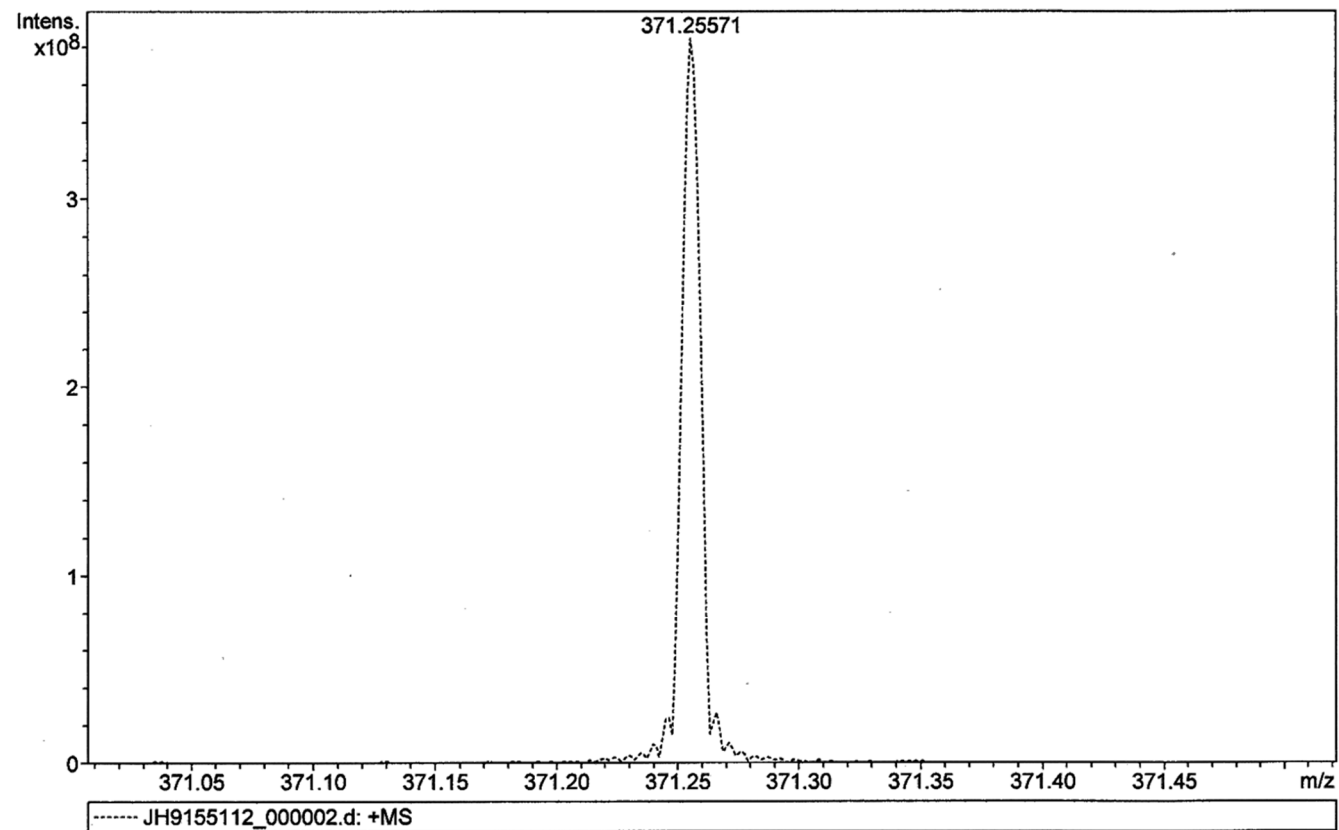

| Meas. m/z | # | Formula                                          | Score  | m/z       | err [mDa] | err [ppm] | mSigma | rdb | e <sup>-</sup> Conf | N-Rule |
|-----------|---|--------------------------------------------------|--------|-----------|-----------|-----------|--------|-----|---------------------|--------|
| 371.25571 | 1 | C <sub>22</sub> H <sub>36</sub> NaO <sub>3</sub> | 100.00 | 371.25567 | -0.04     | -0.11     | 3.0    | 4.5 | even                | ok     |

Figure S10. HRESIMS spectrum of 4

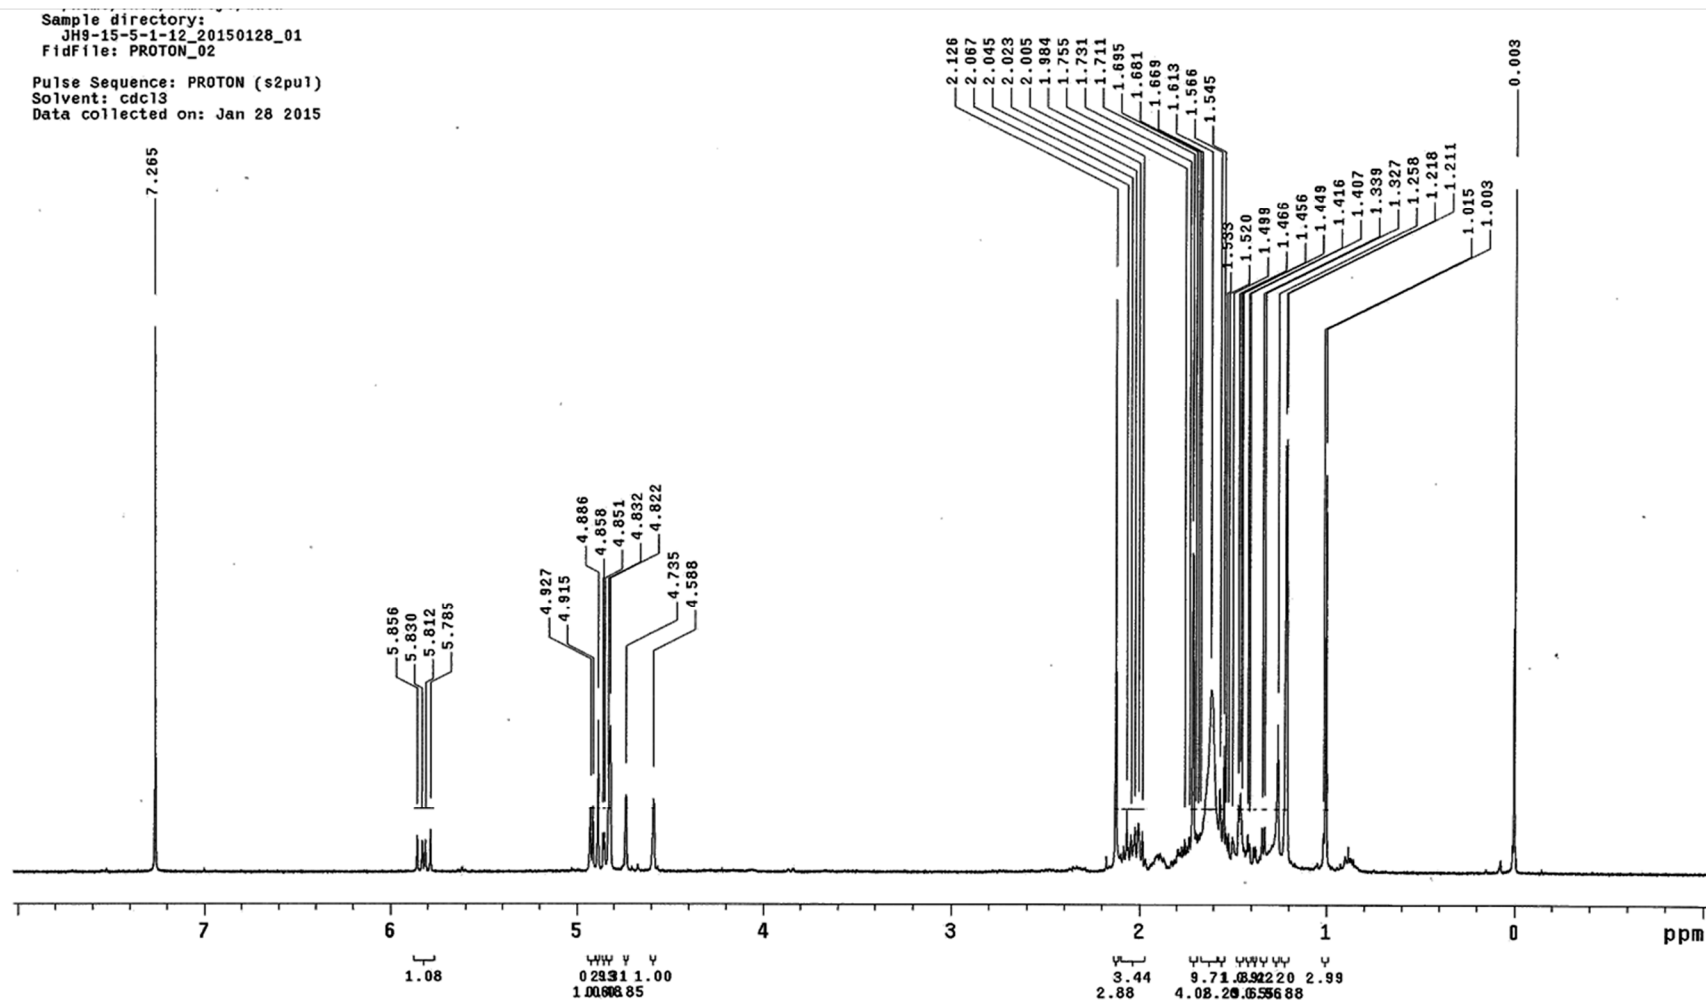Figure S11.  $^1\text{H}$  NMR spectrum of **4** in  $\text{CDCl}_3$  at 400 MHz

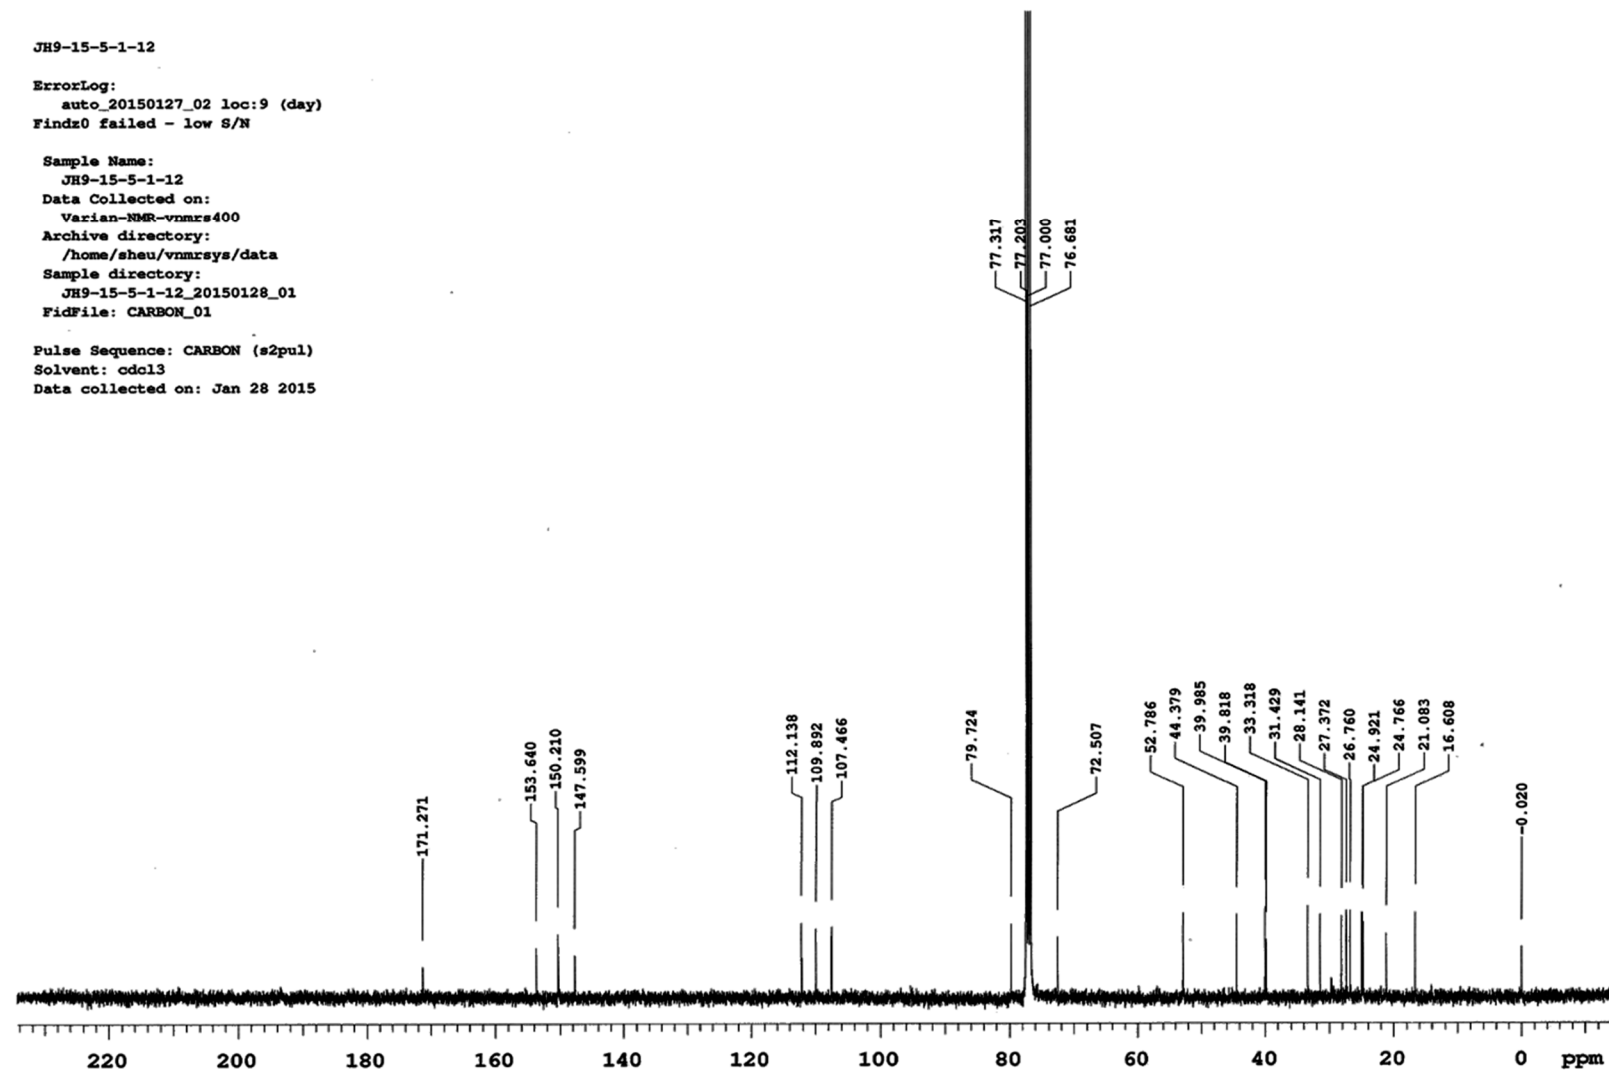Figure S12.  $^{13}\text{C}$  NMR spectrum of 4 in  $\text{CDCl}_3$  at 100 MHz

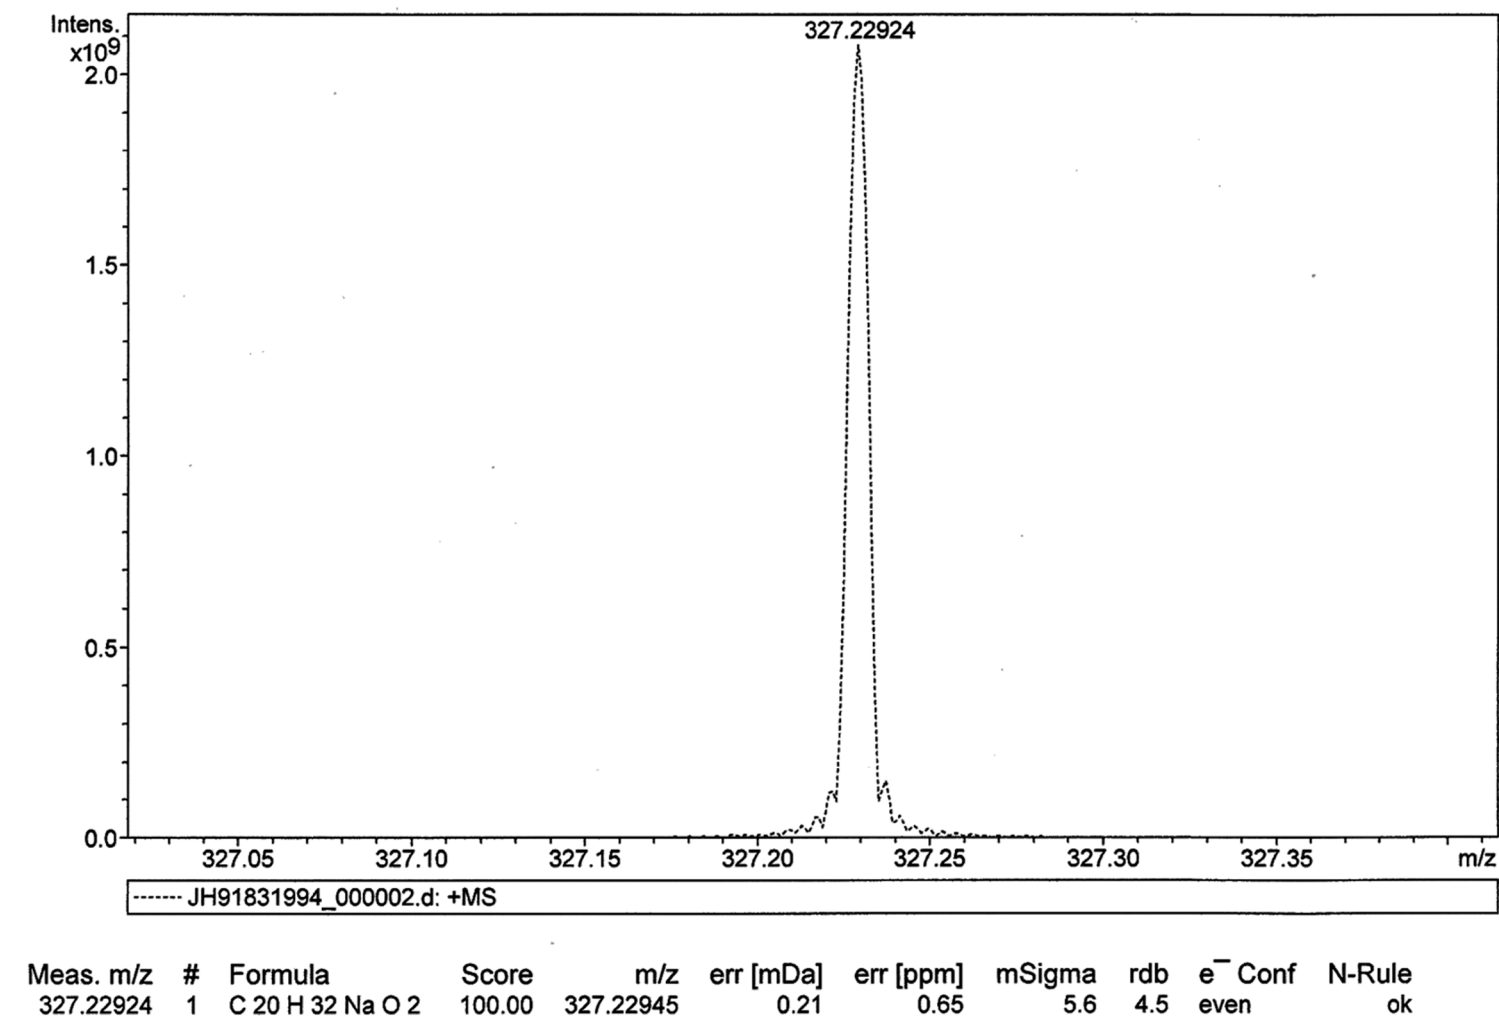

Figure S13. HRESIMS spectrum of 5

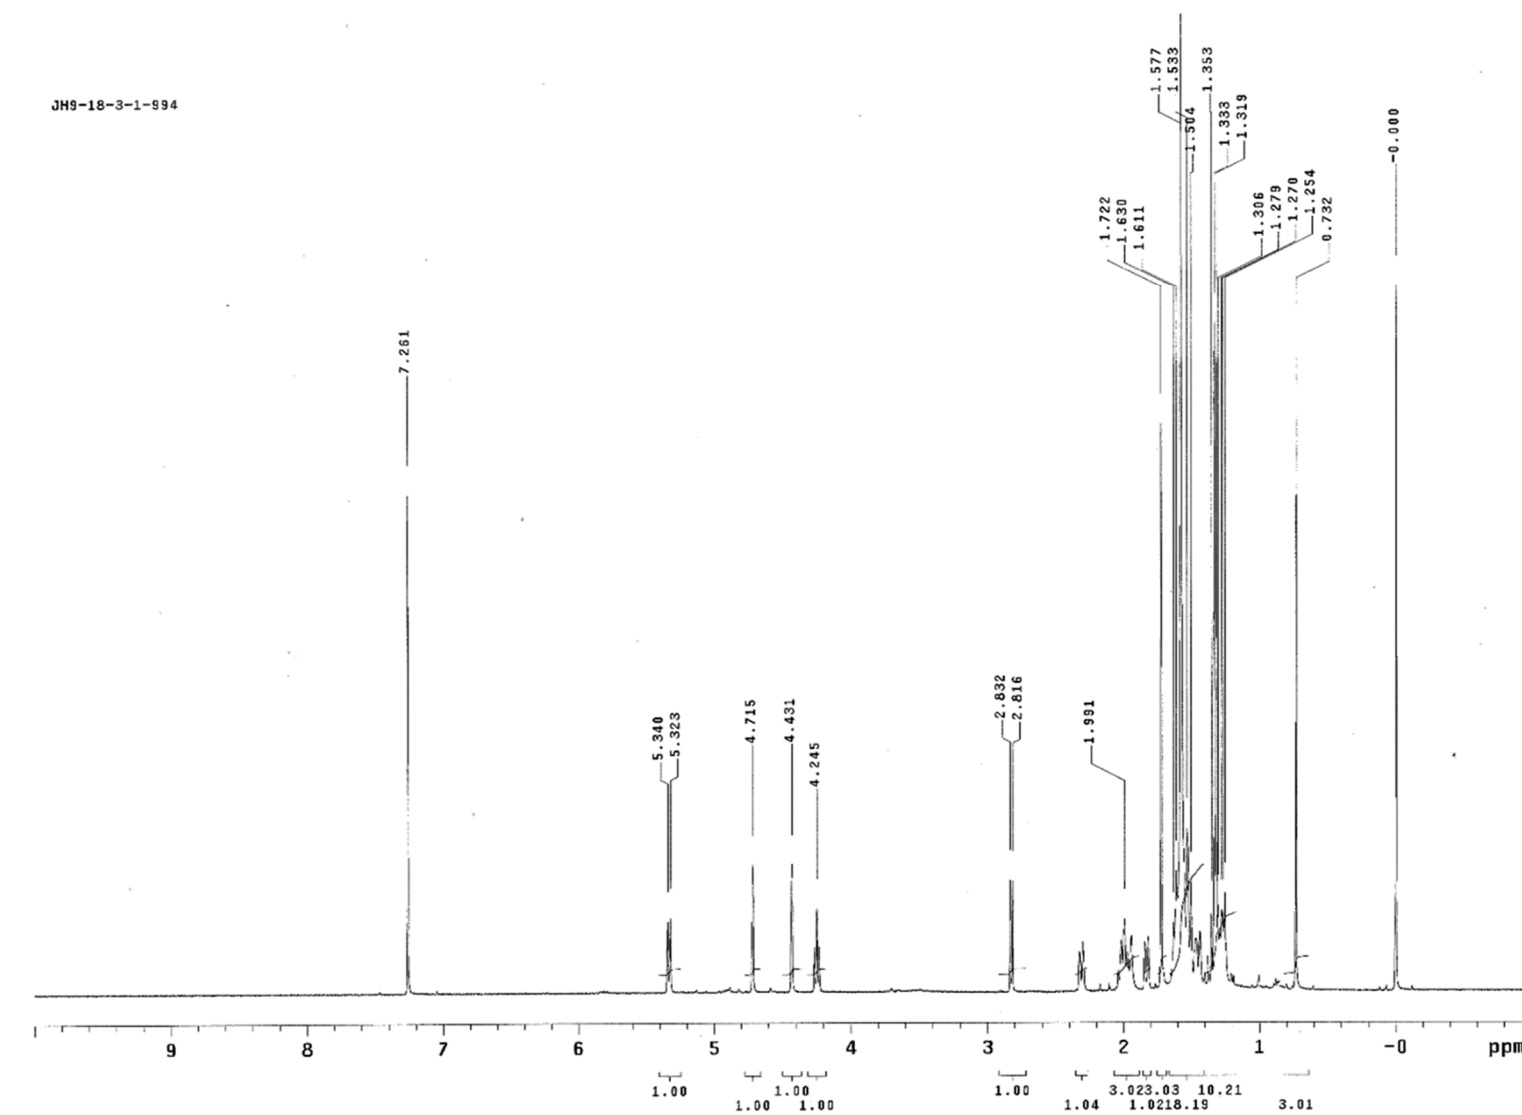

Figure S14.  $^1\text{H}$  NMR spectrum of **5** in  $\text{CDCl}_3$  at 500 MHz

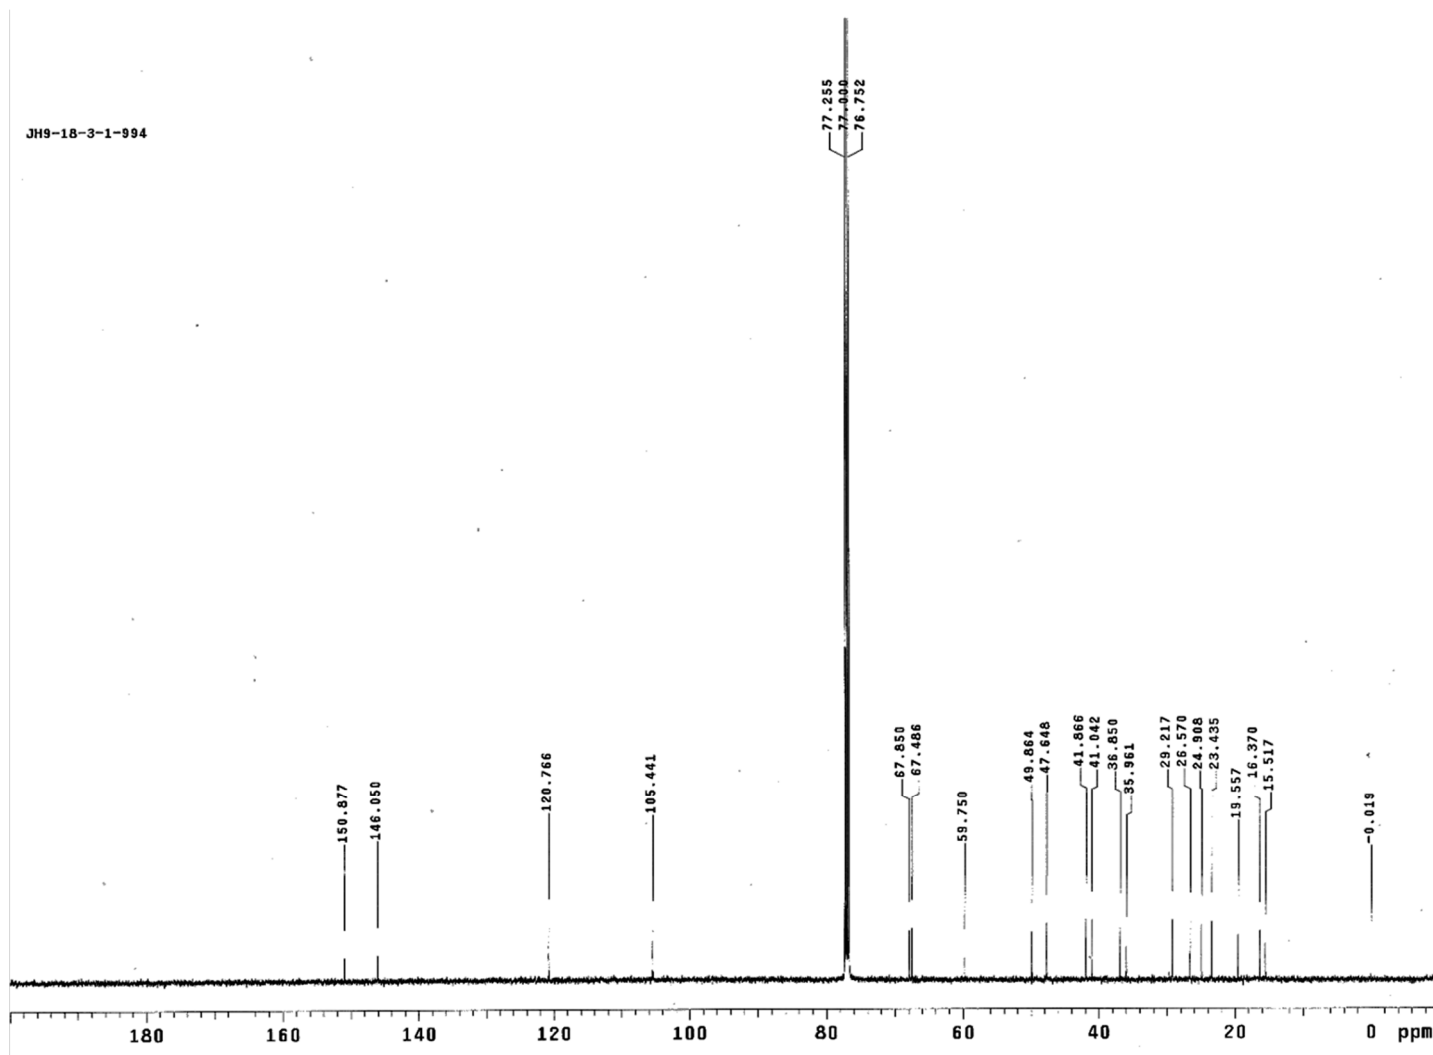

Figure S15.  $^{13}\text{C}$  NMR spectrum of 5 in  $\text{CDCl}_3$  at 125 MHz
